# Supplementary material for: Chemical conversion of human conventional PSCs to TSCs following transient naive gene activation
Source: PubMed Central journal article supplement — EMBO Rep. 2023 Feb 27;24(4):e55235. doi: 10.15252/embr.202255235 (PMC10074076; doi:10.15252/embr.202255235), 2023-02-27
Supplement: EMBR-24-e55235-s008.pdf [file EMBR-24-e55235-s008.pdf]

# **Appendix for**

## **Chemical conversion of human conventional PCs to TSCs following transient naive genes activation**

### **Table of Contents:**

- |                                                     |     |
|-----------------------------------------------------|-----|
| 1. Appendix Table S1: RNA-Seq samples description   | p.2 |
| 2. Appendix Table S2: Antibodies used in this study | p.5 |
| 3. Appendix Table S3: Primers used in this study    | p.6 |

**Appendix Table S1: RNA-seq samples description.**

| <b>RNA-seq sample</b>        | <b>Description</b>                                             | <b>Passage number</b> | <b>Total number of reads</b> | <b>Mapping rate</b> |
|------------------------------|----------------------------------------------------------------|-----------------------|------------------------------|---------------------|
| HPD01 naive-iPSCs_Replicate1 | Naive-iPSCs generated in Giulitti et al 2019; XY               | p16                   | 6493019                      | 72.16%              |
| HPD01 naive-iPSCs_Replicate2 | Naive-iPSCs generated in Giulitti et al 2019; XY               | p23                   | 6114651                      | 68.55%              |
| HPD01 naive-iPSCs_Replicate3 | Naive-iPSCs generated in Giulitti et al 2019; XY               | p22                   | 5846014                      | 55.27%              |
| HPD06 naive-iPSCs_Replicate1 | Naive-iPSCs generated in Giulitti et al 2019; XY               | p21                   | 6230340                      | 79.12%              |
| HPD06 naive-iPSCs_Replicate2 | Naive-iPSCs generated in Giulitti et al 2019; XY               | p25                   | 6215948                      | 63.95%              |
| HPD06 naive-iPSCs_Replicate3 | Naive-iPSCs generated in Giulitti et al 2019; XY               | p26                   | 6864856                      | 63.84%              |
| H9 primed-ESCs_Replicate1    | Primed-ESCs from WiCell, WA09; XX                              | p48                   | 6802773                      | 85.94%              |
| H9 primed-ESCs_Replicate2    | Primed-ESCs from WiCell, WA09; XX                              | p50                   | 5759737                      | 87.55%              |
| H9 primed-ESCs_Replicate3    | Primed-ESCs from WiCell, WA09; XX                              | p51                   | 5812252                      | 86.49%              |
| HPD00_Replicate1             | Primed-iPSCs generated in Giulitti et al 2019; XY              | p18                   | 5721612                      | 85.46%              |
| HPD00_Replicate2             | Primed-iPSCs generated in Giulitti et al 2019; XY              | p20                   | 5565440                      | 85.24%              |
| HPD00_Replicate3             | Primed-iPSCs generated in Giulitti et al 2019; XY              | p21                   | 6187377                      | 80.51%              |
| KiPS_primed-iPSCs_Replicate1 | Primed-iPSCs generated in Takashima et al 2014; XX             | p28                   | 7755245                      | 81.45%              |
| KiPS_primed-iPSCs_Replicate2 | Primed-iPSCs generated in Takashima et al 2014; XX             | p30                   | 10300785                     | 84.88%              |
| KiPS_primed-iPSCs_Replicate3 | Primed-iPSCs generated in Takashima et al 2014; XX             | p32                   | 7950602                      | 79.84%              |
| KiPS_D0_Replicate1           | Primed-iPSCs during chemical resetting Day 0 in this study; XX | p34                   | 5916326                      | 81.72%              |
| KiPS_D0_Replicate2           | Primed-iPSCs during chemical resetting Day 0 in this study; XX | p34                   | 6696795                      | 74.42%              |
| KiPS_reset_D2_Replicate1     | Primed-iPSCs during chemical resetting Day 2 in this study; XX | p34                   | 5912890                      | 67.76%              |
| KiPS_reset_D2_Replicate2     | Primed-iPSCs during chemical resetting Day 2 in this study; XX | p34                   | 6324224                      | 69.47%              |

|                                |                                                                 |         |         |        |
|--------------------------------|-----------------------------------------------------------------|---------|---------|--------|
| KiPS_reset_D3_Replicate1       | Primed-iPSCs during chemical resetting Day 3 in this study; XX  | p34     | 5344963 | 71.64% |
| KiPS_reset_D3_Replicate2       | Primed-iPSCs during chemical resetting Day 3 in this study; XX  | p34     | 6081910 | 74.68% |
| KiPS_reset_D4_PXGL             | Primed-iPSCs during chemical resetting Day 4 in this study; XX  | p34     | 6665374 | 74.99% |
| KiPS_reset_D4_TSC              | Primed-iPSCs during chemical resetting Day 4 in this study; XX  | p34     | 5740672 | 74.19% |
| KiPS_reset_D5_PXGL             | Primed-iPSCs during chemical resetting Day 5 in this study; XX  | p34 + 1 | 8067449 | 74.19% |
| KiPS_reset_D5_TSC              | Primed-iPSCs during chemical resetting Day 5 in this study; XX  | p34 + 1 | 7833808 | 75.63% |
| KiPS_reset_D6_PXGL_Replicate1  | Primed-iPSCs during chemical resetting Day 6 in this study; XX  | p34 + 1 | 7638130 | 78.17% |
| KiPS_reset_D6_PXGL_Replicate2  | Primed-iPSCs during chemical resetting Day 6 in this study; XX  | p34 + 1 | 8783827 | 77.07% |
| KiPS_reset_D6_TSC_Replicate1   | Primed-iPSCs during chemical resetting Day 6 in this study; XX  | p34 + 1 | 7593040 | 75.36% |
| KiPS_reset_D6_TSC_Replicate2   | Primed-iPSCs during chemical resetting Day 6 in this study; XX  | p34 + 1 | 8453812 | 77.49% |
| KiPS_reset_D9_PXGL_Replicate1  | Primed-iPSCs during chemical resetting Day 9 in this study; XX  | p34 + 1 | 8054184 | 64.26% |
| KiPS_reset_D9_PXGL_Replicate2  | Primed-iPSCs during chemical resetting Day 9 in this study; XX  | p34 + 1 | 9056851 | 66.17% |
| KiPS_reset_D9_TSC_Replicate1   | Primed-iPSCs during chemical resetting Day 9 in this study; XX  | p34 + 1 | 6187265 | 73.43% |
| KiPS_reset_D9_TSC_Replicate2   | Primed-iPSCs during chemical resetting Day 9 in this study; XX  | p34 + 1 | 6808432 | 71.36% |
| KiPS_reset_D12_PXGL_Replicate1 | Primed-iPSCs during chemical resetting Day 12 in this study; XX | p34 + 2 | 7865342 | 64.28% |
| KiPS_reset_D12_PXGL_Replicate2 | Primed-iPSCs during chemical resetting Day 12 in this study; XX | p34 + 2 | 8223342 | 62.68% |
| KiPS_reset_D12_TSC_Replicate1  | Primed-iPSCs during chemical resetting Day 12 in this study; XX | p34 + 2 | 7156108 | 74.45% |
| KiPS_reset_D12_TSC_Replicate2  | Primed-iPSCs during chemical resetting Day 12 in this study; XX | p34 + 2 | 8840607 | 75.16% |
| TSC-H9_Replicate1              | TSCs derived from reset H9 Naive ESCs; XX                       | p10     | 8905595 | 70.83% |
| TSC-H9_Replicate2              | TSCs derived from reset H9 Naive ESCs; XX                       | p10     | 7908147 | 66.60% |
| TSC-H9_Replicate3              | TSCs derived from reset H9 Naive ESCs; XX                       | p10     | 7581655 | 71.88% |

|                                    |                                                    |       |         |        |
|------------------------------------|----------------------------------------------------|-------|---------|--------|
| TSC-HPD06_Replicate1               | TSCs derived from HPD06 Naive-iPSCs; XY            | p15   | 8079700 | 79.25% |
| TSC-HPD06_Replicate2               | TSCs derived from HPD06 Naive-iPSCs; XY            | p15   | 8488619 | 75.72% |
| TSC-HPD06_Replicate3               | TSCs derived from HPD06 Naive-iPSCs; XY            | p15   | 8016237 | 81.59% |
| ccTSC.01_Replicate1                | Chemical converted TSC.01; XX                      | p10   | 7763957 | 65.54% |
| ccTSC.01_Replicate2                | Chemical converted TSC.01; XX                      | p10   | 7724602 | 64.45% |
| ccTSC.01_Replicate3                | Chemical converted TSC.01; XX                      | p10   | 6992013 | 70.22% |
| ccTSC.02_Replicate1                | Chemical converted TSC.02; XX                      | p10   | 6172789 | 71.01% |
| ccTSC.02_Replicate2                | Chemical converted TSC.02; XX                      | p10   | 6133967 | 65.66% |
| ccTSC.02_Replicate3                | Chemical converted TSC.02; XX                      | p10   | 6784265 | 74.17% |
| KiPS primed-iPSCs_Replicate1       | Primed-iPSCs generated in Takashima et al 2014; XX | p40   | 4918290 | 86.50% |
| KiPS primed-iPSCs_Replicate2       | Primed-iPSCs generated in Takashima et al 2014; XX | p40   | 6351982 | 86.68% |
| KiPS primed-iPSCs_Replicate3       | Primed-iPSCs generated in Takashima et al 2014; XX | p42   | 6021428 | 86.42% |
| KiPS primed-iPSCs_Replicate4       | Primed-iPSCs generated in Takashima et al 2014; XX | p45   | 5693196 | 86.70% |
| KiPS-chemical resetting_Replicate1 | Chemical reset into Naive; XX                      | p40+5 | 5756409 | 82.25% |
| KiPS-chemical resetting_Replicate2 | Chemical reset into Naive; XX                      | p40+5 | 5984279 | 82.72% |
| KiPS-chemical resetting_Replicate3 | Chemical reset into Naive; XX                      | p40+5 | 6242607 | 82.04% |
| KiPS-chemical resetting_Replicate4 | Chemical reset into Naive; XX                      | p40+5 | 6378721 | 81.69% |

**Appendix Table S2.** All antibodies used in this study.

| Antibody                                                            | Dilution | Product code | Company              |
|---------------------------------------------------------------------|----------|--------------|----------------------|
| OCT4                                                                | 1:300    | sc-5279      | Santa Cruz           |
| OCT4                                                                | 1:100    | 565644       | BD Biosciences       |
| KLF17                                                               | 1:250    | HPA024629    | Atlas                |
| KRT7                                                                | 1:100    | AB183344     | Abcam                |
| GATA3                                                               | 1:100    | AF2605       | R&D                  |
| SUSD2                                                               | 1:100    | 130-127-902  | MACS Miltenyi Biotec |
| SDC1                                                                | 1:100    | AB130405     | Abcam                |
| HLA-G                                                               | 1:100    | AB283260     | Abcam                |
| Donkey anti-Goat IgG (H+L)<br>Secondary Antibody Alexa<br>Fluor 488 | 1:500    | A-11055      | ThermoFisher         |
| Donkey anti-Mouse IgG (H+L)<br>Secondary Antibody Alexa Fluor 568   | 1:500    | A-10037      | ThermoFisher         |
| Donkey anti-Rabbit IgG (H+L)<br>Secondary Antibody Alexa Fluor 647  | 1:500    | A-31573      | ThermoFisher         |

**Appendix Table S3.** All primers used in this study.

| Gene    | Forward primer (5'-3')   | Reverse primer (5'-3')  |
|---------|--------------------------|-------------------------|
| GAPDH   | CGAGATCCCTCCAAAATCAA     | GGCAGAGATGATGACCCTTT    |
| DPPA5   | AAGTGGATGCTCCAGTCCAT     | ATCCAAGGGCCTAGTTCGAG    |
| KLF17   | CACACAGGTGAGAGGCCATA     | TATGCGGGTACACACCAGAT    |
| KLF4    | CCCAATTACCCATCCTTCCT     | CAGGTGTGCCTTGAGATGG     |
| TFCP2L1 | GGAGTTCCAGCCATGCTCTT     | CCTGCTTGAAGATGGGCAGA    |
| OCT4    | GTGGAGGAAGCTGACAACAA     | ATTCTCCAGGTTGCCTCTCA    |
| ZIC2    | CATGCACGGTCCACACCTC      | CTCATGGACCTTCATGTGCTT   |
| NANOG   | TTTGTGGGCCTGAAGAAACT     | AGGGCTGTCTGAATAAGCAG    |
| GATA2   | GACTACAGCAGCGGACTCTT     | GCCTTCTGAACAGGAACGAG    |
| GATA3   | ACAGAAGGCAGGGAGTGTGT     | TCCGTTTCATTTTGTGATAGAGC |
| KRT7    | AGGAGAGCGAGCAGATCAAG     | CTTGGTCTCCAGCAGCTTGT    |
| TFAP2A  | TCCAATGAGCAAGTGACAA      | CAGCAGGTCGGTGAACCTCTT   |
| HAVCR1  | GGCGTATATTGTTGCCGTGT     | GACGGTTGGAACAGTTGTGA    |
| IGFBP3  | CCTGCCGTAGAGAAATGGAA     | AAGGGCGACACTGCTTTTTT    |
| ELF5    | ACTTCATCCTCCAGAACATCC    | AGTCTTTGATGGTGGCCTTG    |
| TP63    | ACGAAGATCCCCAGATGATG     | TGCTGTTGCCTGTACGTTTC    |
| CGB     | ACCCTGGCTGTGGAGAAGG      | ATGGACTCGAAGCGCACA      |
| INHA1   | ATCCTTTTCCCAGCCACAG      | GCCGGAACATGTATCTGAAG    |
| PSG1    | GGTACAAAGGGCAAATGAGG     | ATTCTGGATCAGCAGGGATG    |
| CGA     | ATGGGCTGCTGCTTCTCTA      | CGTGTGGTTCTCCACTTTGA    |
| CGB2    | ATGTCAAAGGGGCTGCTG       | GCACAGATGGTGGTGTGAC     |
| SDC1    | GCTGACCTTCACACTCCCCA     | CAAAGGTGAAGTCCTGCTCCC   |
| PSG3    | TGGGAAGTTTCAGCTATCAGG    | TGGGAAGTTTCAGCTATCAGG   |
| PSG5    | GAGGGCTCTATACTTGCTCTGTTT | TTGGATTAAGGAGAGGAAGACG  |
| INHA1   | ATCCTTTTCCCAGCCACAG      | GCCGGAACATGTATCTGAAG    |

|       |                       |                         |
|-------|-----------------------|-------------------------|
| VGLL3 | GATTCCTGCTCCCCAGTGT   | TCAGTACCACGGTGATTCCTT   |
| NOTUM | TGCTTCTTTGGCTACAAGGTC | GGCACGTCCTTGAGTGTGT     |
| SNAI1 | TCTAGGCCCTGGCTGCTAC   | GCCTGGCACTGGTACTTCTT    |
| ITGA5 | GCCTGTGGAGTACAAGTCCTT | AATTCGGGTGAAGTTATCTGTGG |
